# Supplementary material for: Spontaneous deposition of high-density Pt single atoms on oxides via charge polarization between oxides and carbon
Source: Royal Society of Chemistry journal article supplement (doi:10.1039/d5ta00614g), 2025-01-01
Supplement: d5ta00614g1.pdf [file d5ta00614g1.pdf]

## Supplementary Information

### Spontaneous Deposition of High-Density Pt Single Atoms on Oxides via Charge Polarization between Oxides and Carbon

Jing-Fang Huang,<sup>\*a</sup> Liang-Jhu Chen,<sup>a</sup> Bo-Zhao Yang,<sup>a</sup> and Jeng-Lung Chen<sup>b</sup>

<sup>a</sup> Department of Chemistry, National Chung Hsing University, Taichung 402, Taiwan

<sup>b</sup> National Synchrotron Radiation Research Center, Science-Based Industrial Park, Hsinchu 30076, Taiwan

Correspondence to: [jfh@dragon.nchu.edu.tw](mailto:jfh@dragon.nchu.edu.tw)

**This PDF file includes:**

Electrochemical determination of  $D_{ec}$ .

Schemes S1-S2

Figures. S1-S20

Tables S1-S3

## Scheme S1

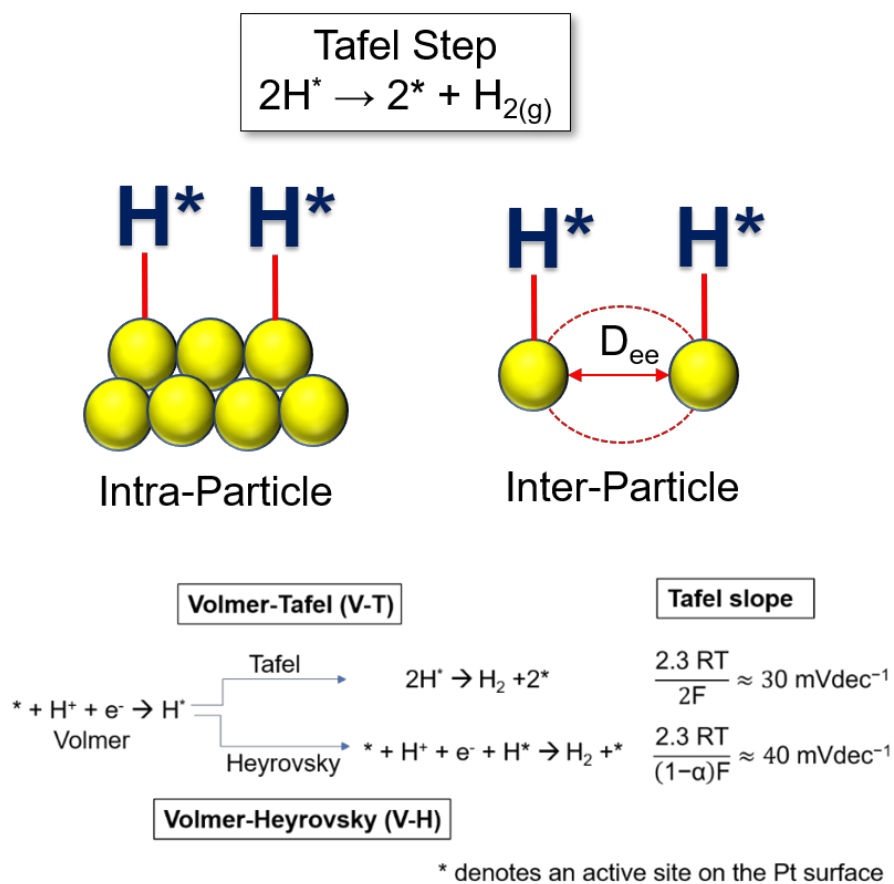

**Scheme S1**  $D_{ee}$  determines the bond formation between two  $\text{H}^*$ , and the HER mechanism.

**Electrochemical characterization of Pt<sub>1</sub>**. The anodic charge ( $Q_{Pt}$ ) of the anodic stripping of Pt<sub>1</sub> from the Pt<sub>1</sub>/oxide/C/GCE was evaluated by anodic CV scanning. The Pt<sub>1</sub> content obtained by ICP-MS was used to confirm  $Q_{Pt}$ . A combination of ECSA<sub>H</sub> and  $Q_{Pt}$  was used to calculate the mean diameter of Pt<sub>1</sub> ( $D_{Pt1}$ ) and the number of Pt<sub>1</sub>s on the electrode ( $N_{Pt1}$ ). Assuming that Pt<sub>1</sub> on the electrode is distributed uniformly and spherical in shape, ECSA<sub>H</sub> and  $Q_{Pt}$  can be calculated using Equations (1) and (2), respectively.

$$ECSA_H = \frac{\pi D_{Pt1}^2}{2} \times N_{Pt1} \quad (1)$$

$$Q_{Pt} = \frac{\pi D_{Pt1}^3 \rho_{Pt}}{6 M_{Pt}} \times n \times F \times N_{Pt1} \quad (2)$$

where  $n=4$  is the number of electrons transferred for the anodic stripping of Pt,  $F$  is the Faraday constant,  $\rho_{Pt}$  is the density of Pt (21.09 g cm<sup>-3</sup>), and  $M_{Pt}$  is the atomic mass of Pt. The  $Q_{Pt1}/ECSA_H$  ratio for evaluating the  $D_{Pt1}$  of Pt<sub>1</sub> is shown by Equation (3):

$$D_{Pt1} = \frac{3 M_{Pt}}{4 F \rho_{Pt}} \times \frac{Q_{Pt1}}{ECSA_H} \quad (3)$$

Then,  $N_{Pt1}$  can be obtained from  $D_{Pt1}$ .

### Electrochemical determination of $D_{ee}$ .

We propose the adjacent  $Pt_{1s}$  distance ( $D_{ee}$ , the edge-to-edge distance between two adjacent SAs) as a controlling parameter for the HER kinetics of the  $Pt_1$ -SACs.  $D_{ee}$  represents the distance between two  $Pt_{1s}$  affected by the control parameters ( $D_{Pt_1}$ ,  $A_{BET}$  (the Brunauer-Emmett-Teller (BET) surface area of oxides), and Pt loading). We assume that all  $Pt_{1s}$  exhibit spherical shapes for the calculation of  $D_{ee}$ . The  $Pt_{1s}$  are monodispersed and homogeneously distributed on the oxide support (Scheme S2).

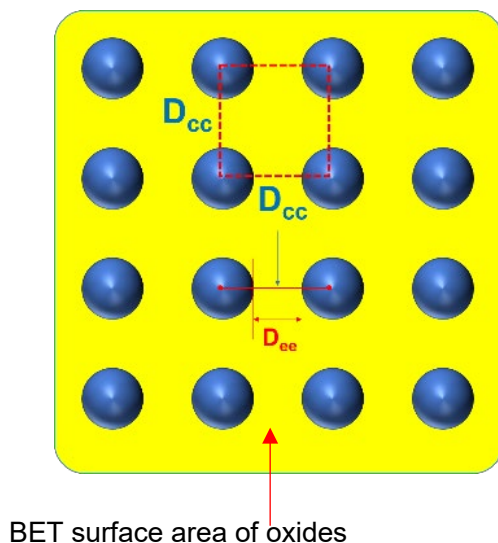

**Scheme S2** Evaluation of  $D_{ee}$ :  $D_{cc}$  (center-to-center distance between  $Pt_1$ ) =  $(A_{BET}/N_{Pt_1})^{0.5}$ ,  $D_{ee} = D_{cc} - D_{Pt_1} = (A_{BET}/N_{Pt_1})^{0.5} - D_{Pt_1}$ . (Note:  $N_{Pt_1}$  is the number of  $Pt_1$  atoms and  $A_{BET}$  is the BET surface area of the oxide).

Figure S1

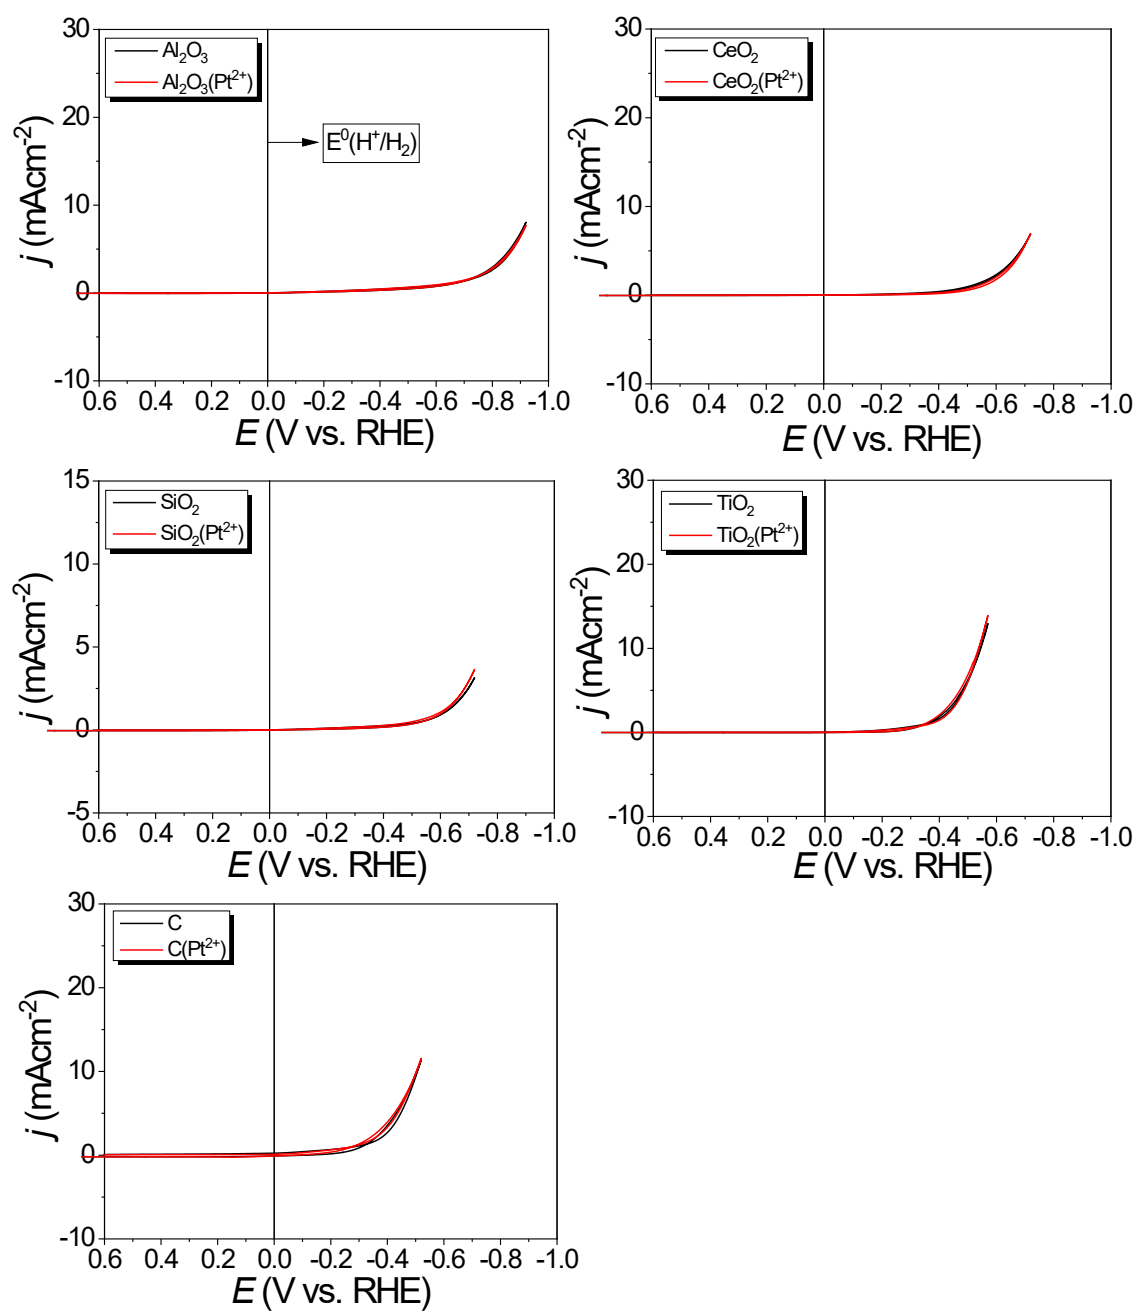

**Figure S1.** CVs of oxides and C before (black line) and after (red line) incubation with  $\text{Pt}_{\text{aq}}$  for 16 h in Ar-saturated 0.5 M  $\text{H}_2\text{SO}_4$  at a scan rate of  $50 \text{ mVs}^{-1}$ .

Figure S2

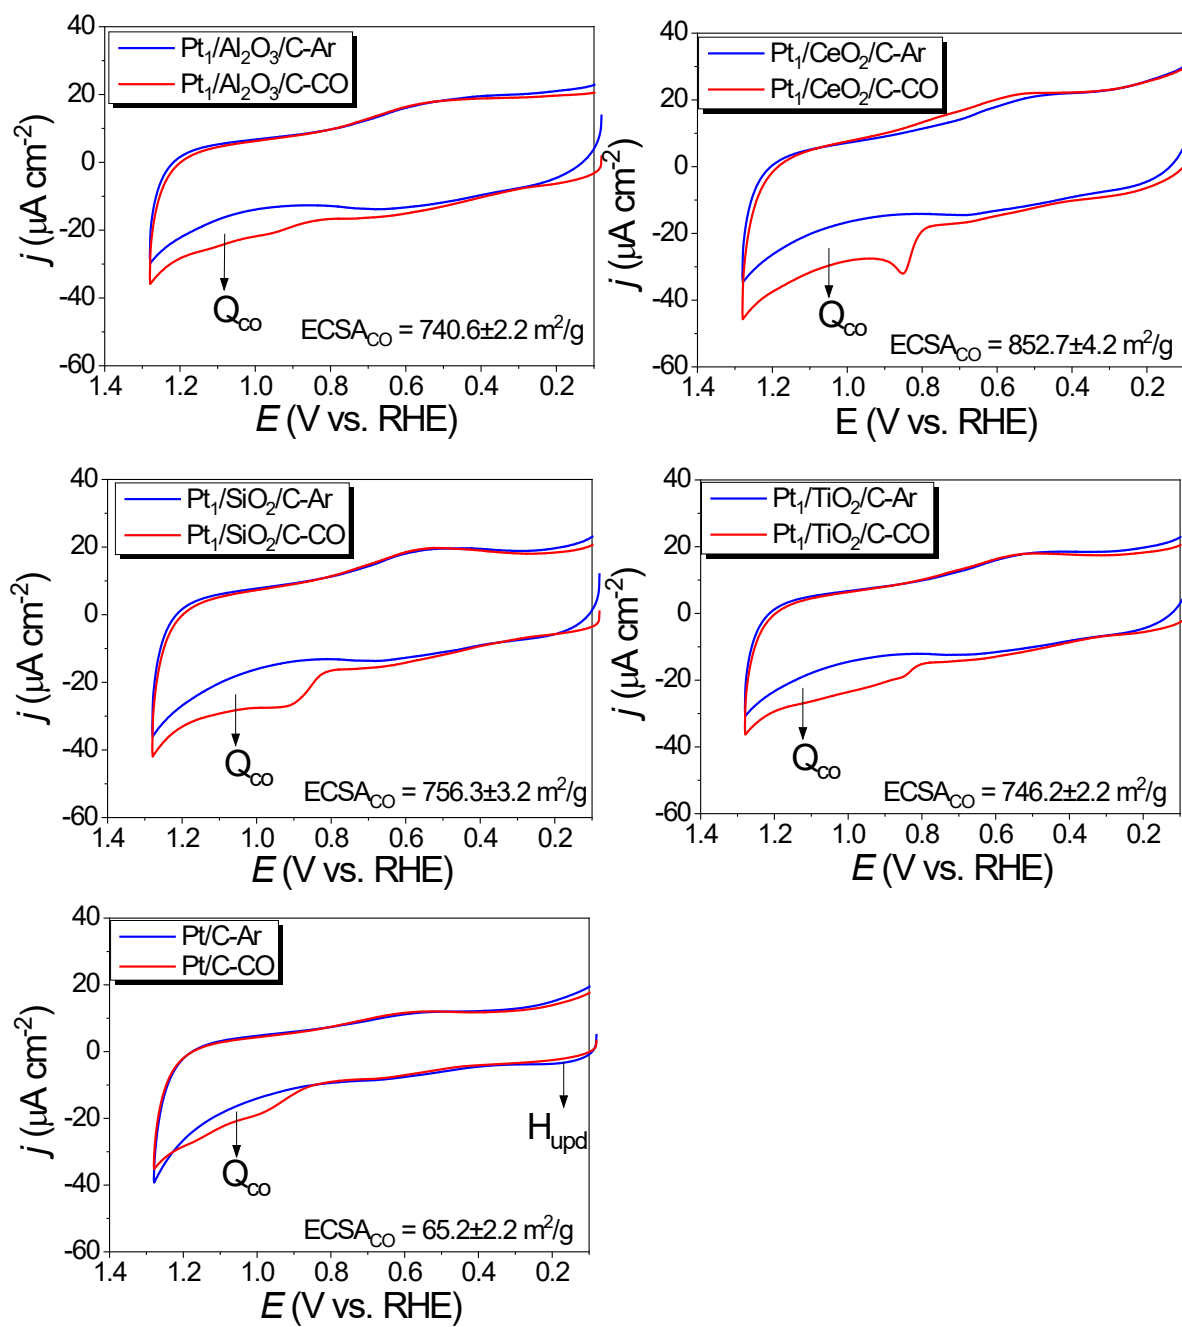

Figure S2 CVs curves of CO<sub>s</sub> for Pt<sub>1</sub>/oxide/C and Pt/C.

Figure S3

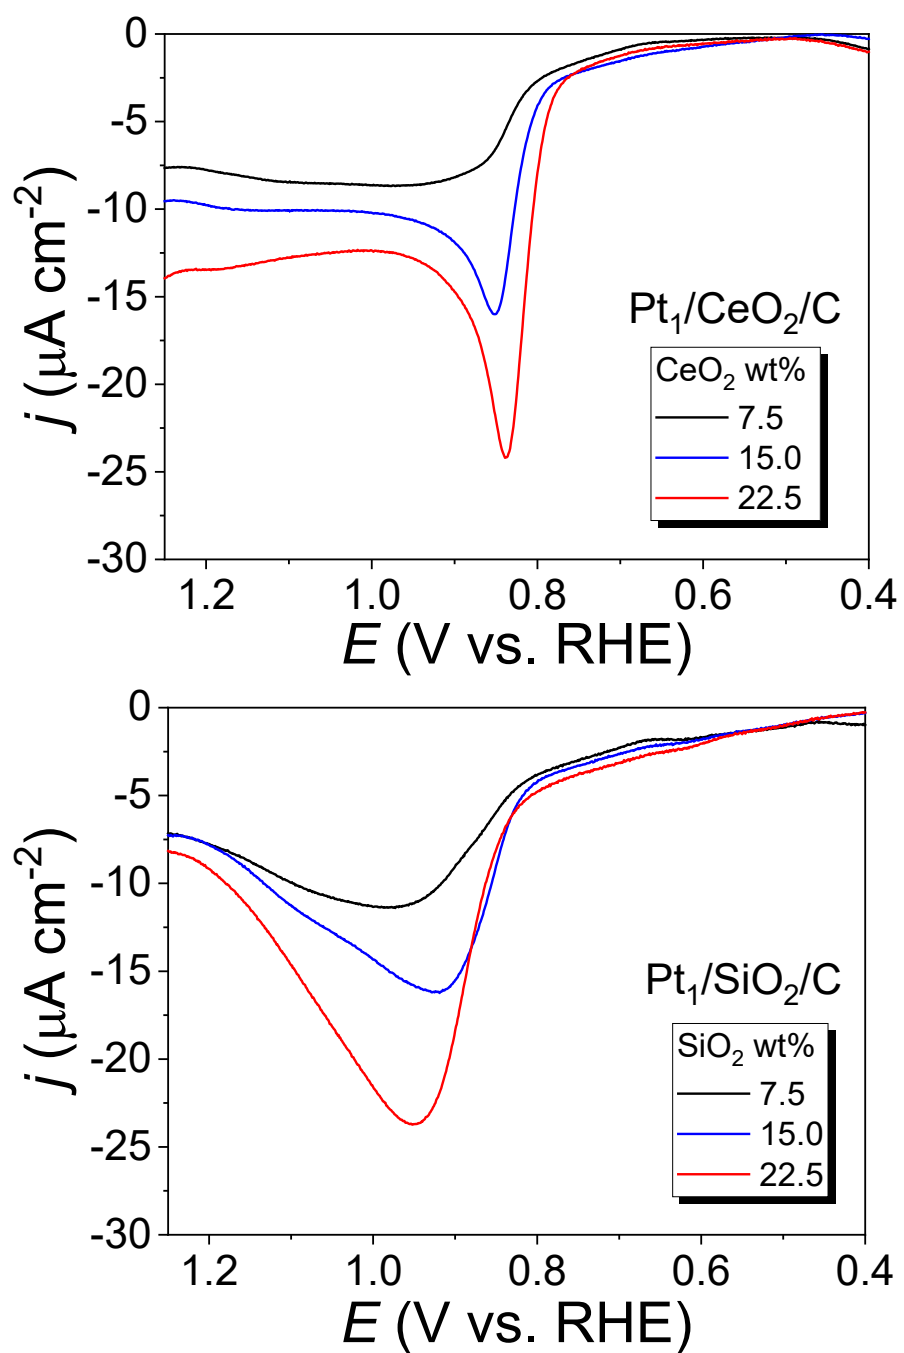

Figure S3 CO-stripping curves for  $\text{Pt}_1/\text{oxide}/\text{C}$  with various oxide contents.

Figure S4

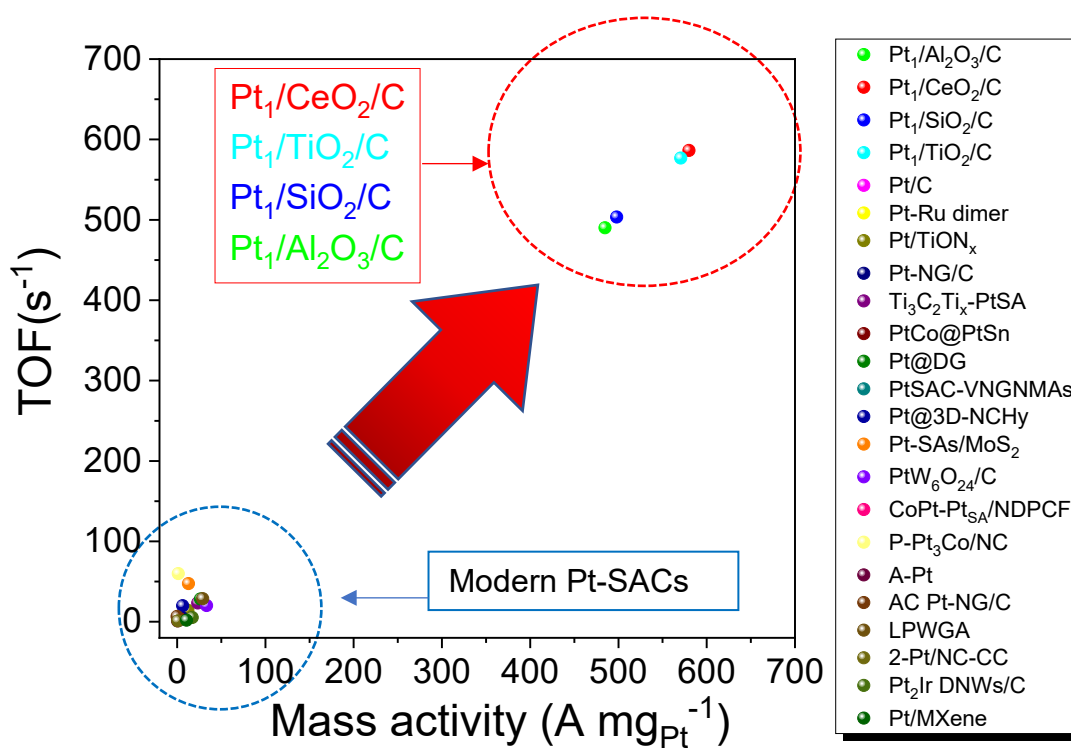

Figure S4  $i_{mPt}$  vs. TOF for  $Pt_1/oxide/C$  and state-of-the-art  $Pt_1$ -SACs in Table S2.



Figure S5

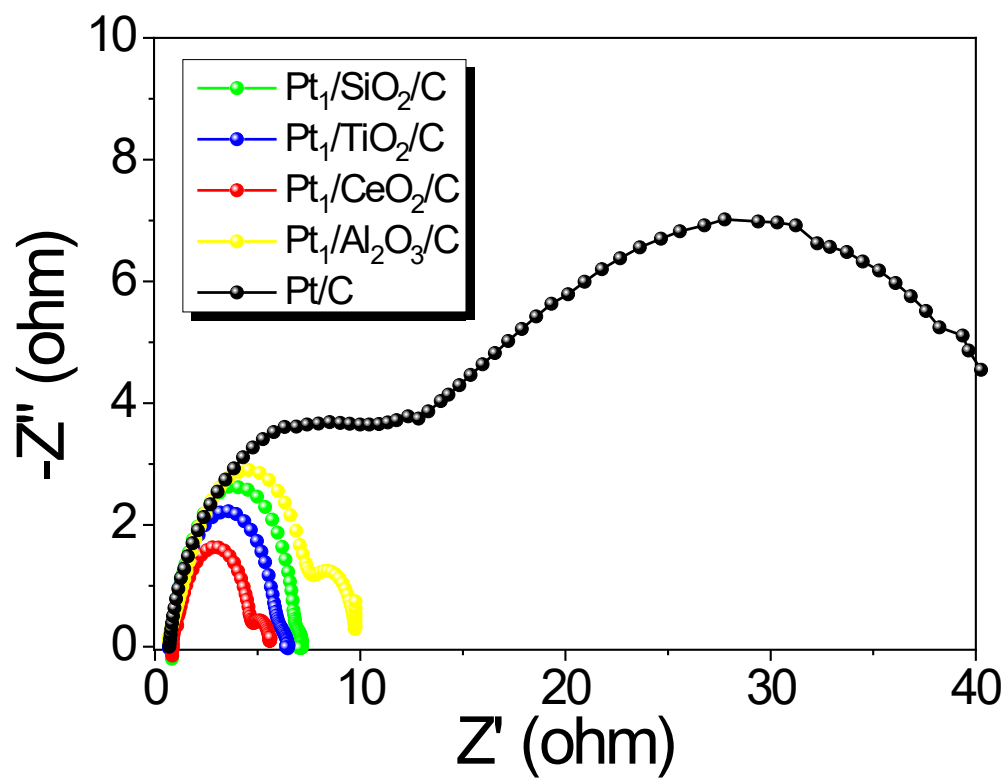

Figure S5 EIS spectra of Pt<sub>1</sub>/oxide/C and Pt/C in Ar-purged H<sub>2</sub>SO<sub>4</sub> at  $\eta = 20$  mV.

**Figure S6**

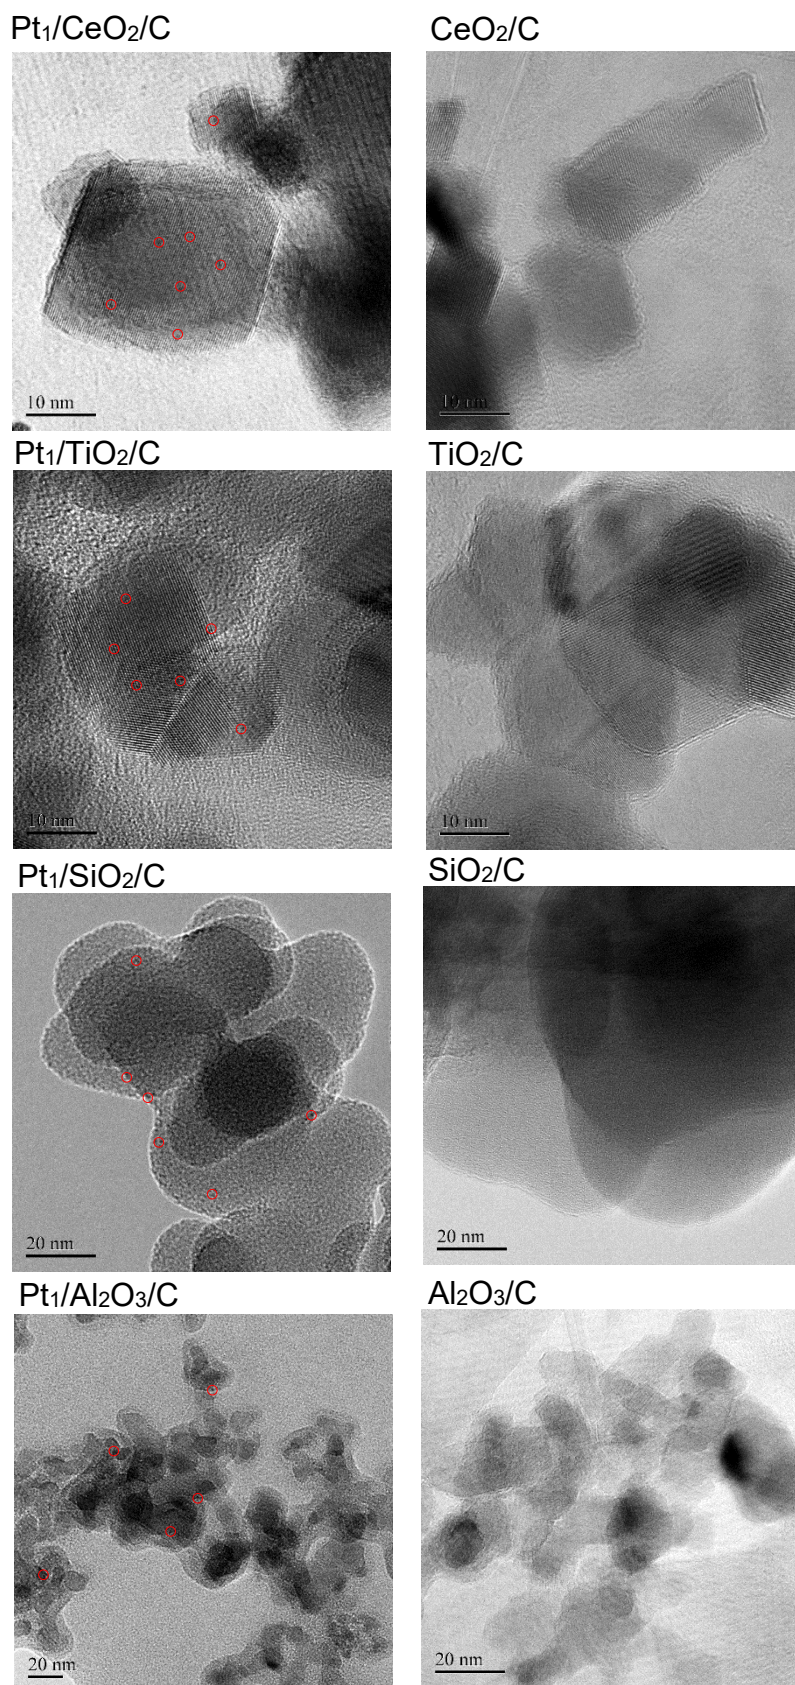

**Figure S6** HR-TEM images of Pt<sub>1</sub>/oxide/C (left) and oxide/C (right). Pt<sub>1</sub>s are selectively highlighted by red circles.

**Figure S7**

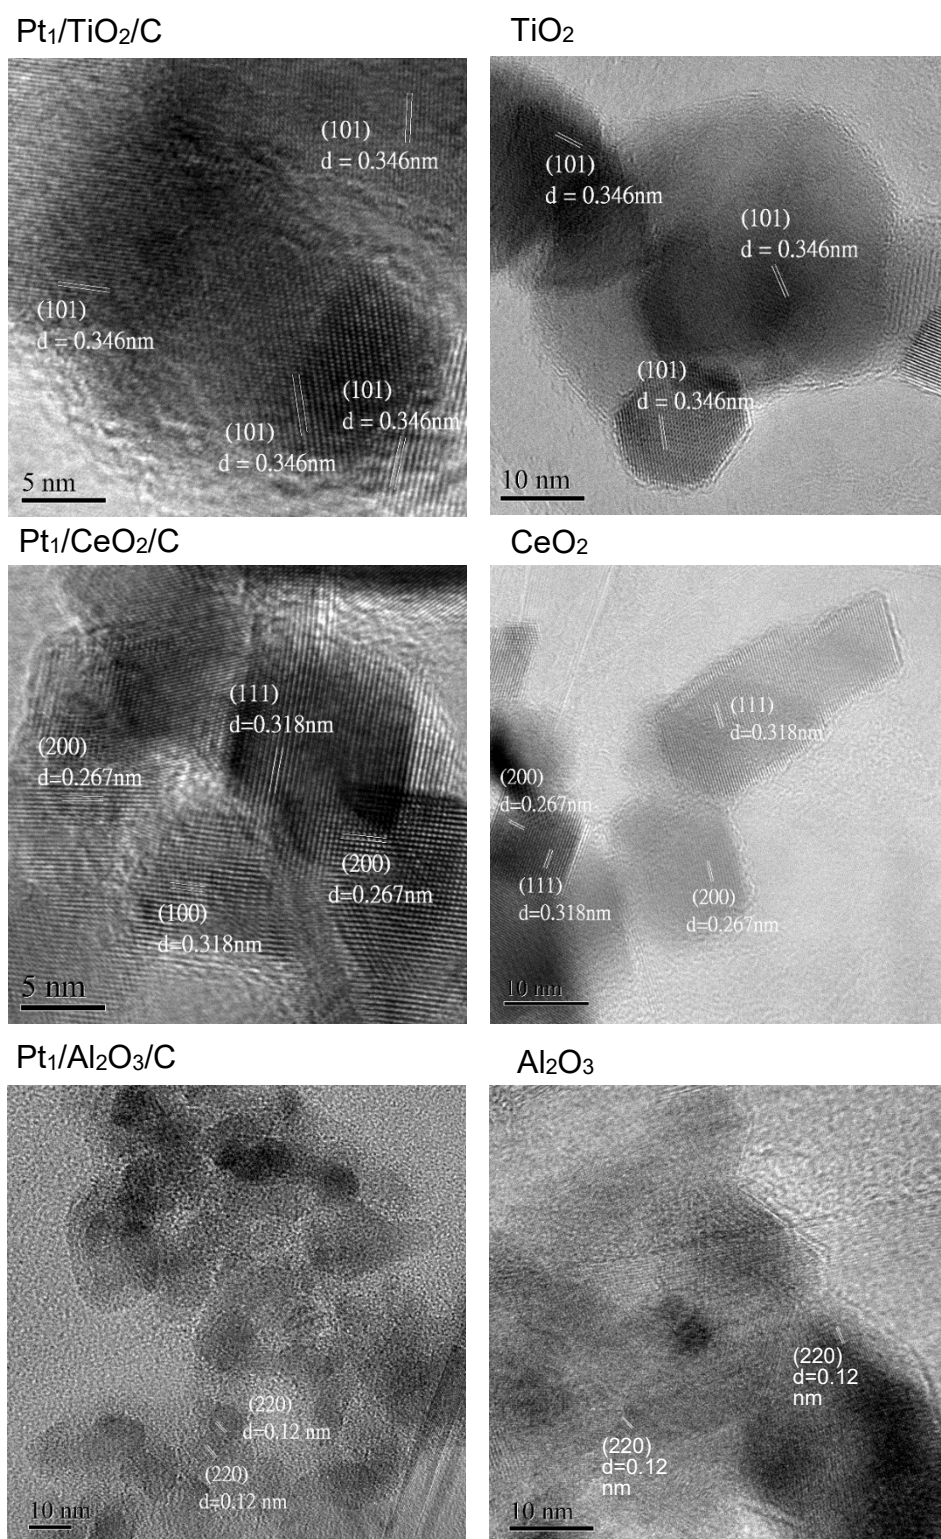

**Figure S7** HR-TEM images of Pt<sub>1</sub>/oxide/C (left) and oxide/C (right). Lattice fringes are selectively marked.

Figure S8

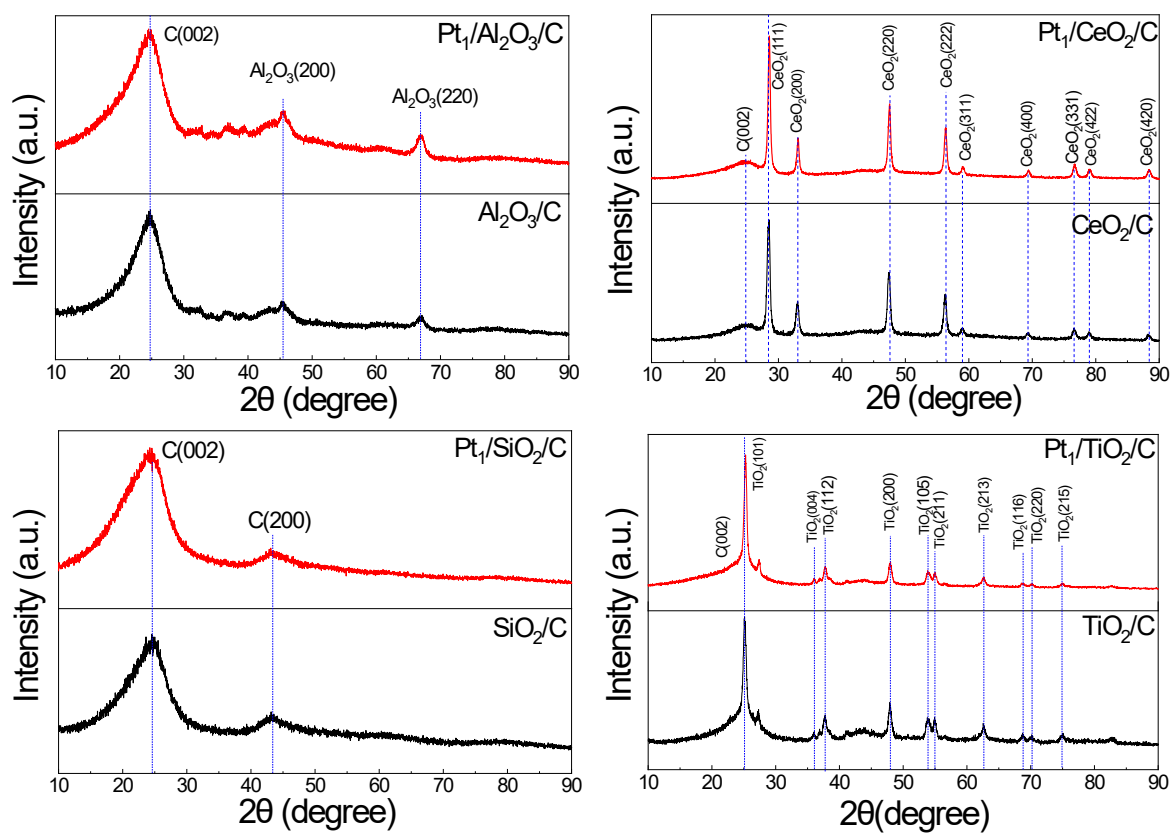

Figure S8 XRD patterns (Cu K $\alpha$ ) of oxide/C (black line) and Pt<sub>1</sub>/oxide/C (red line).

**Figure S9**

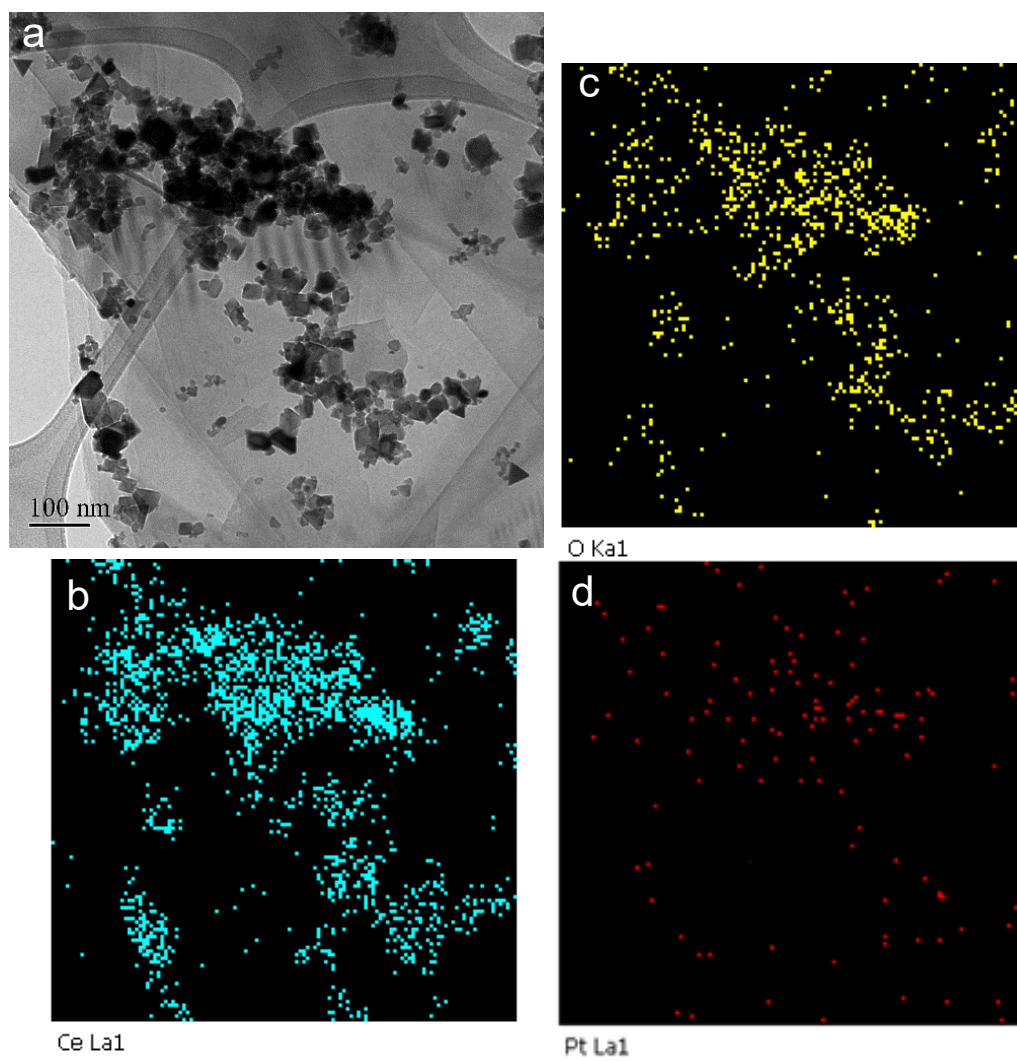

**Figure S9** (a) TEM image of Pt<sub>1</sub>/CeO<sub>2</sub>/C; (b) Ce, (c) O, and (d) Pt EDS mapping in (a).

**Figure S10**

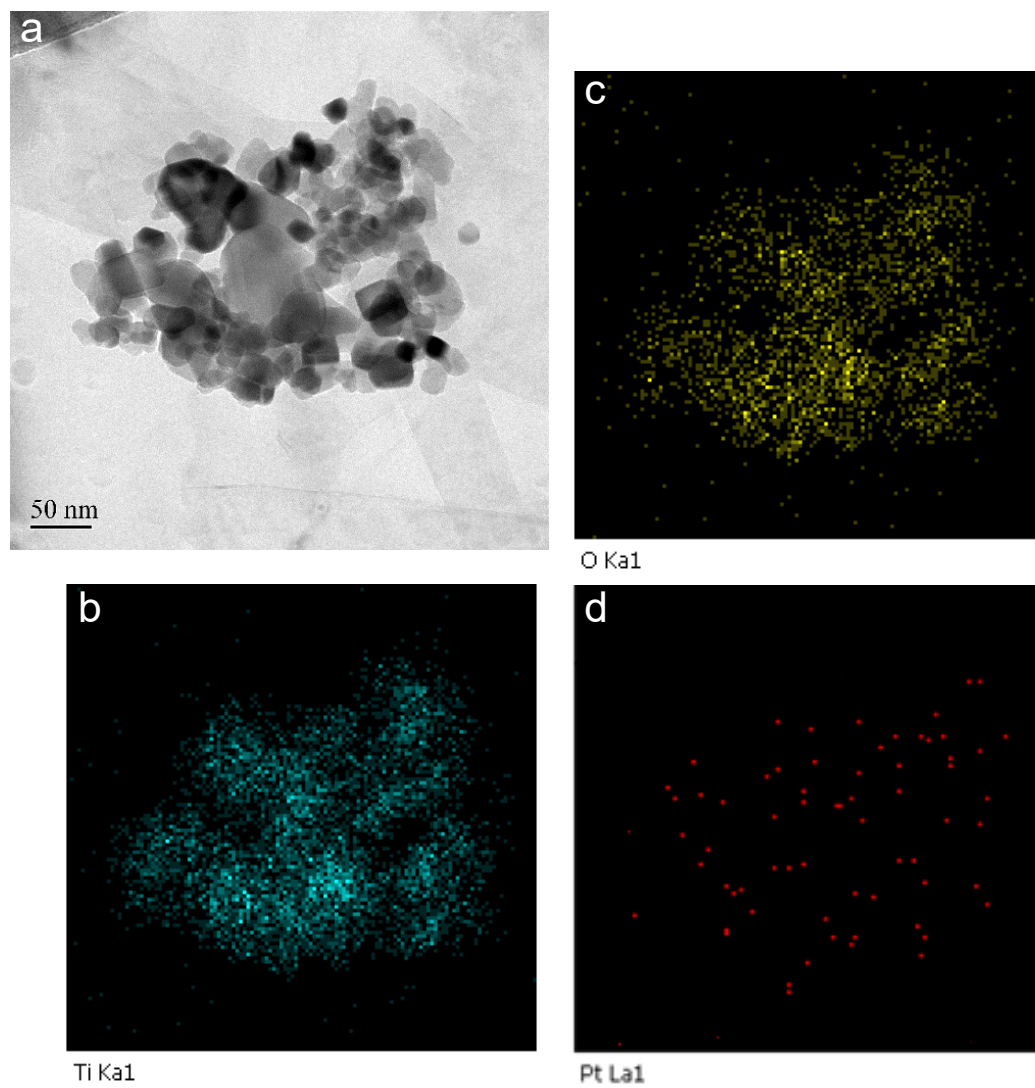

**Figure S10** (a) TEM image of Pt<sub>1</sub>/TiO<sub>2</sub>/C; (b) Ti, (c) O, and (d) Pt EDS mapping in (a).

**Figure S11**

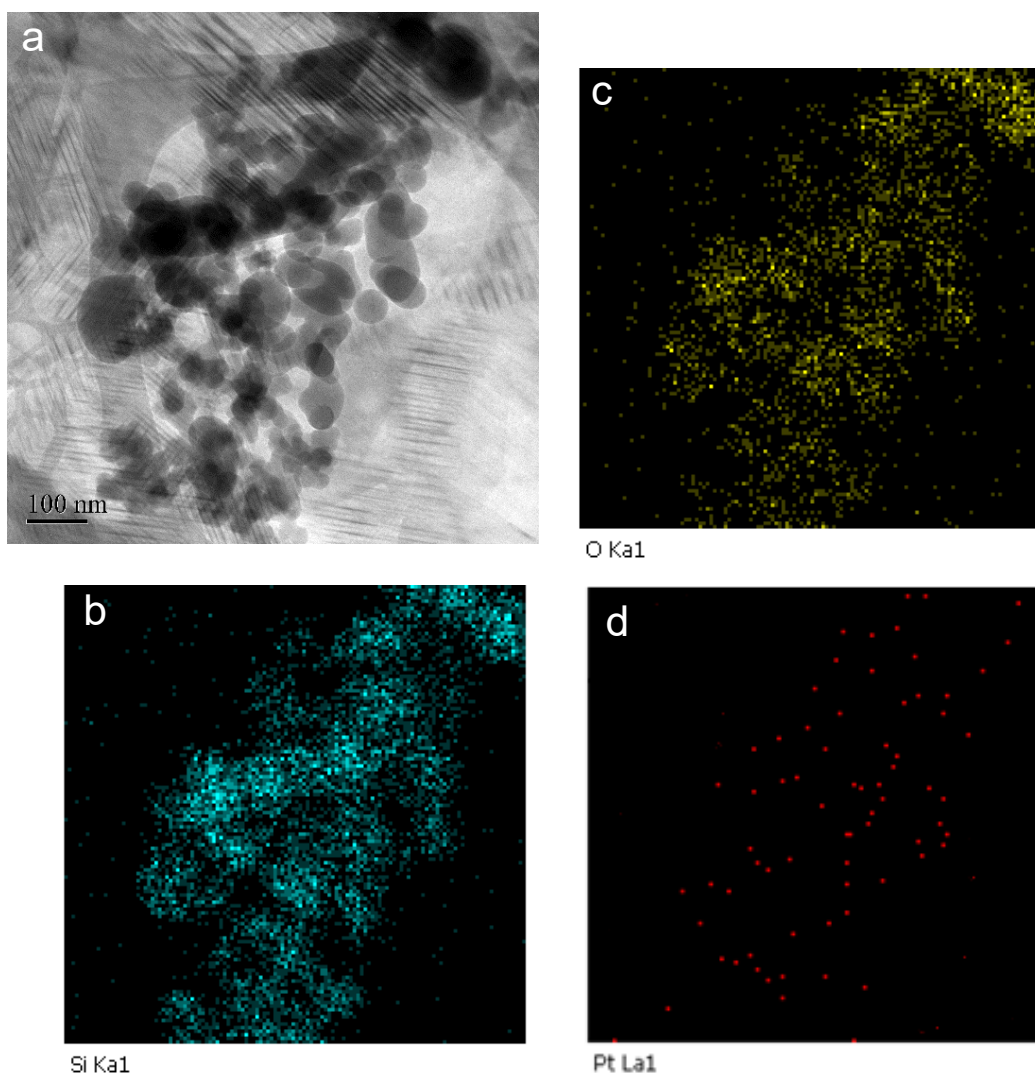

**Figure S11** (a) TEM image of Pt<sub>1</sub>/SiO<sub>2</sub>/C; (b) Si, (c) O, and (d) Pt EDS mapping in (a).

Figure S12

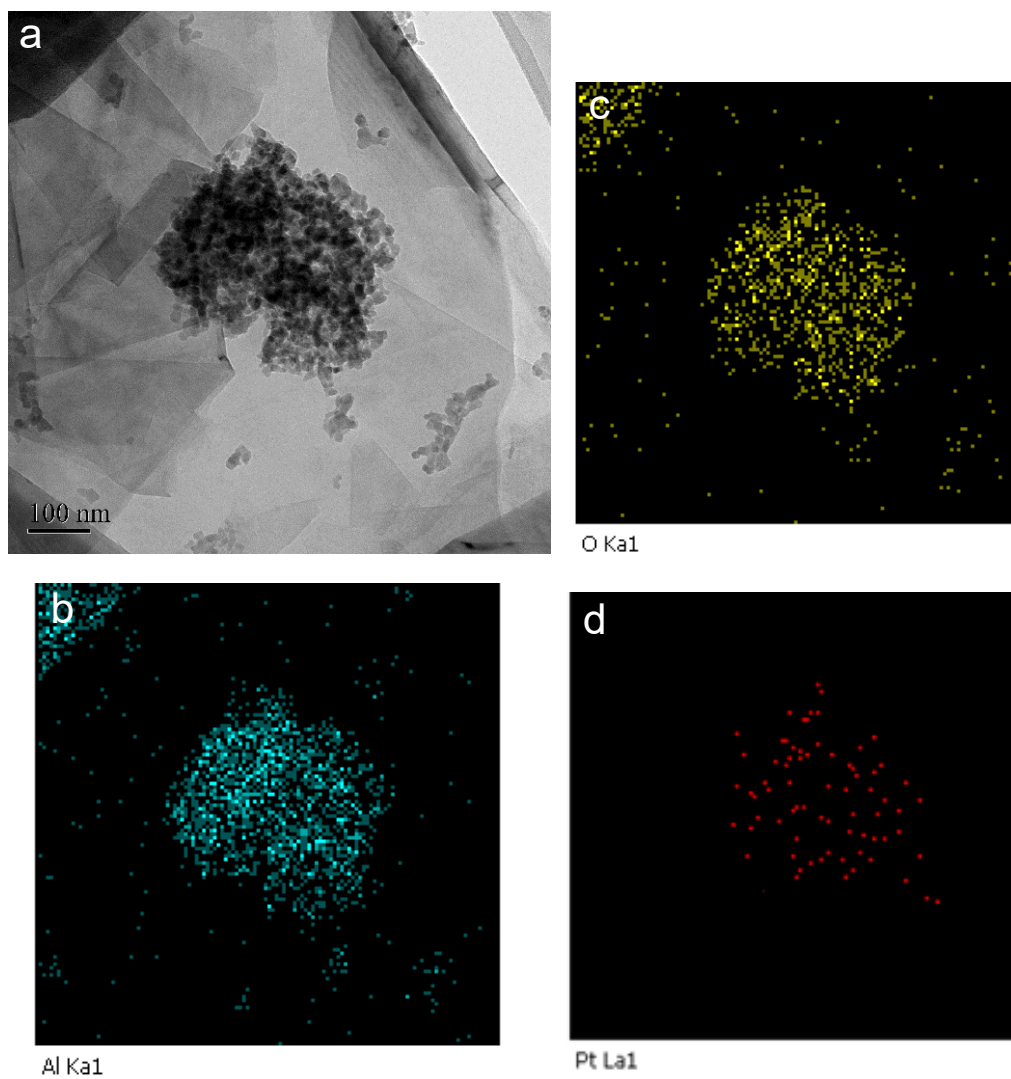

Figure S12 (a) TEM image of Pt<sub>1</sub>/Al<sub>2</sub>O<sub>3</sub>/C; (b) Al, (c) O, and (d) Pt EDS mapping in (a).



Figure S13

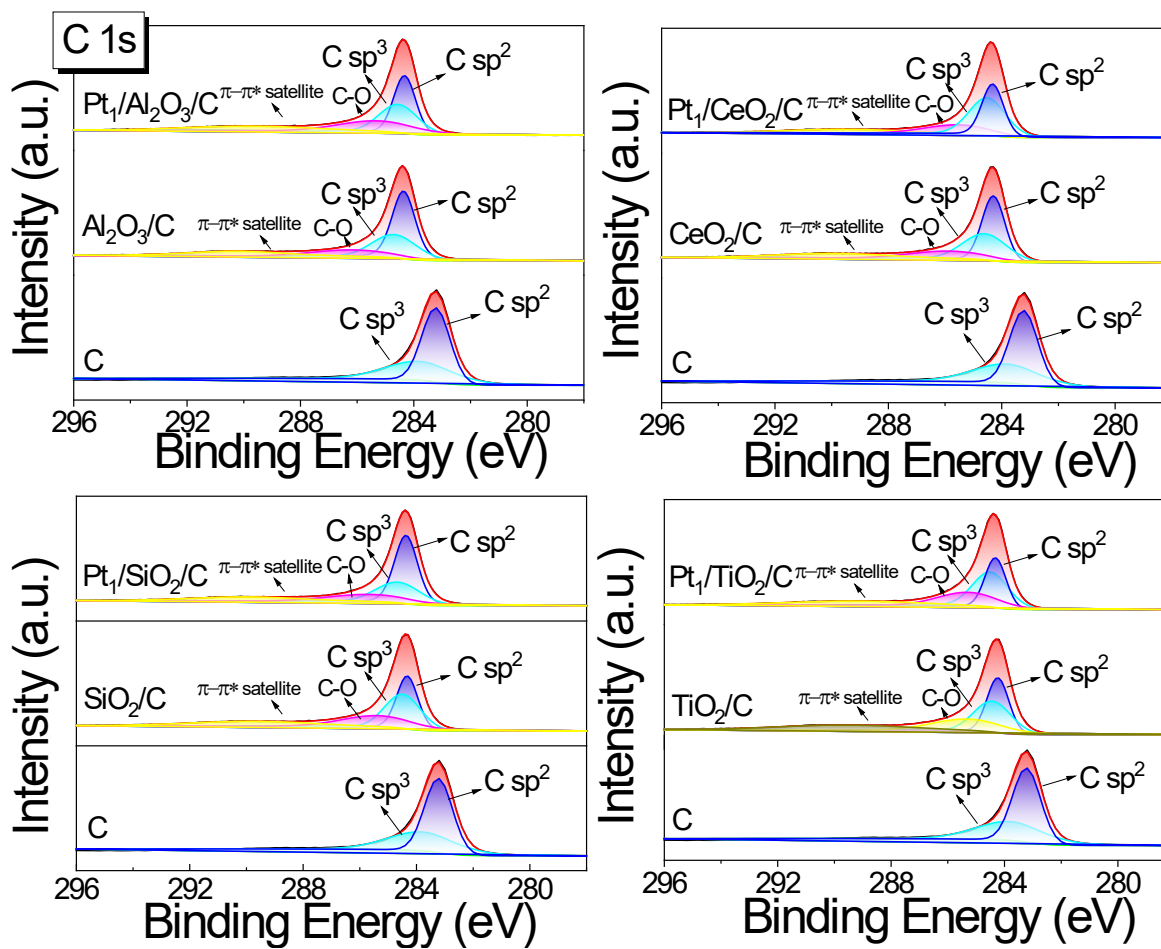

Figure S13 High-resolution XPS C 1s spectra of Pt<sub>1</sub>/oxide/C, oxide/C, and C.

Figure S14

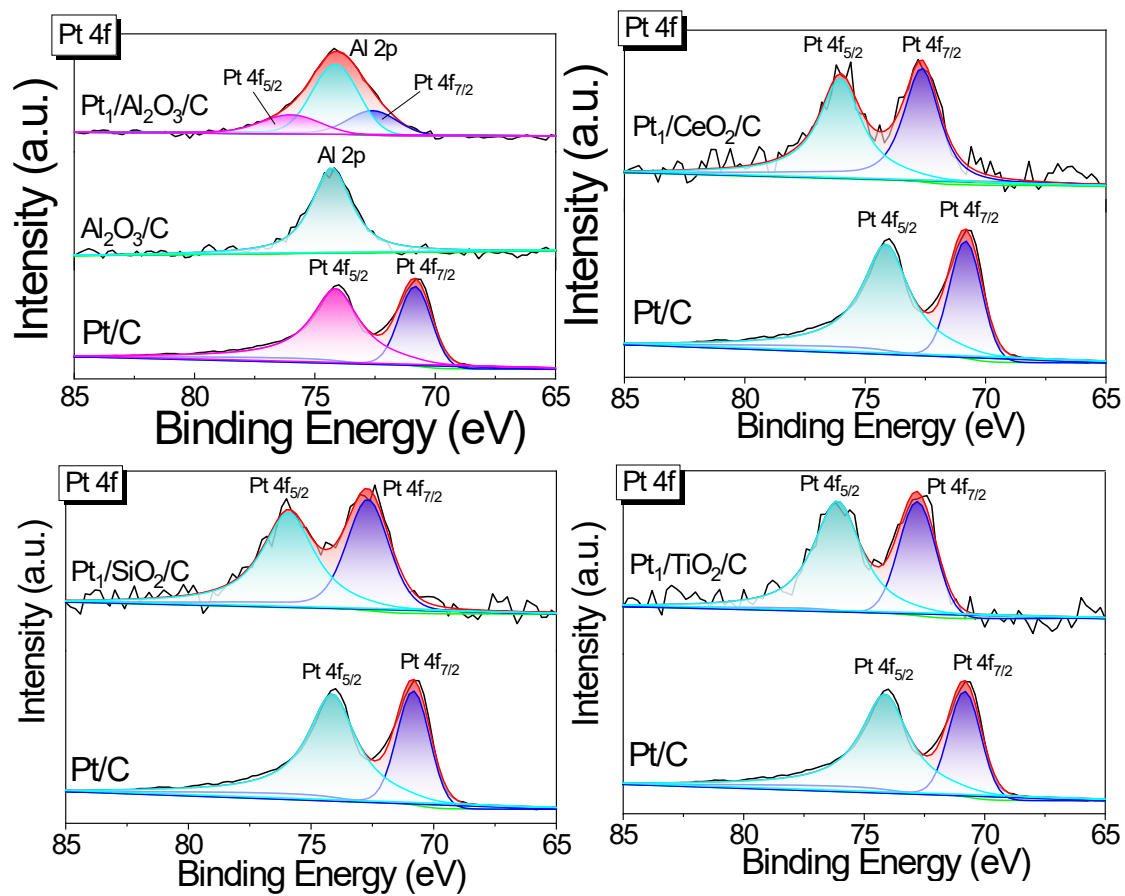

Figure S14 High-resolution XPS Pt 4f spectra of Pt<sub>1</sub>/oxide/C and Pt/C.

Figure S15

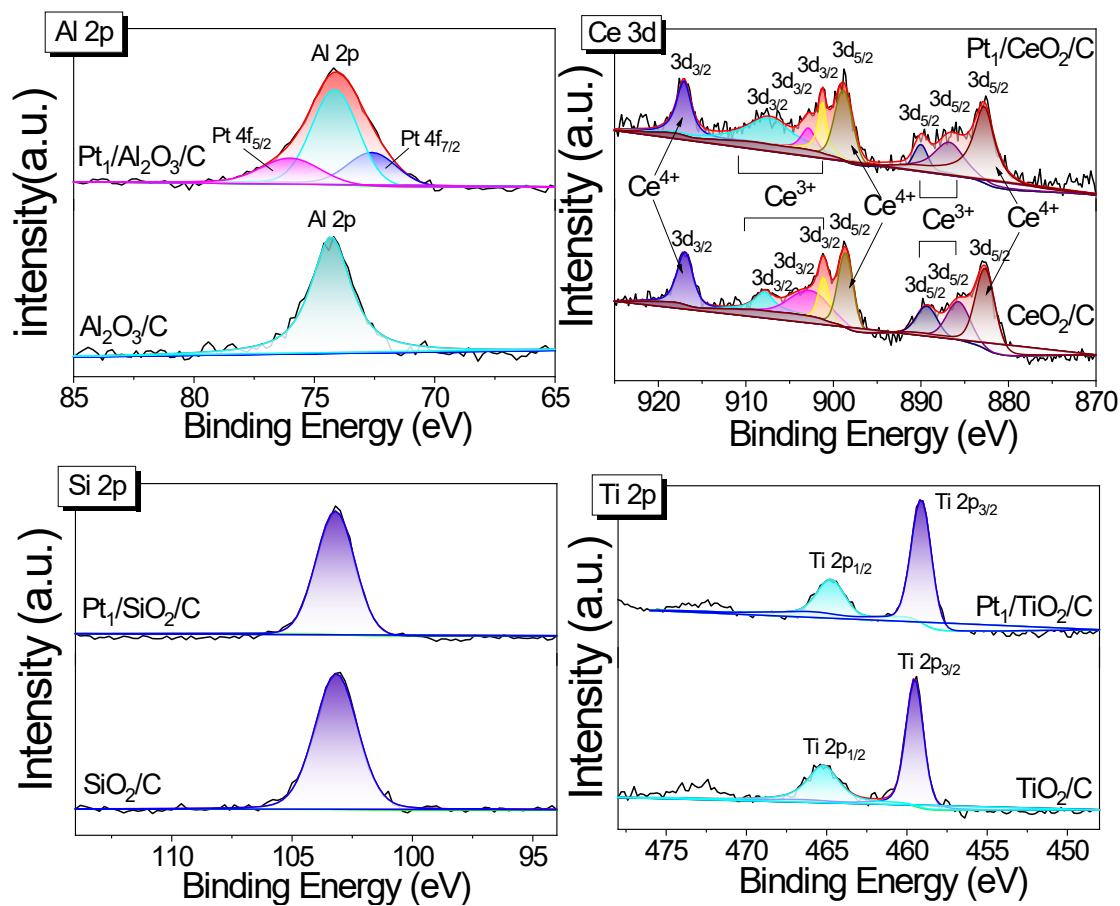

Figure S15 High-resolution XPS Al 2p, Ce 3d, Si 2p, and Ti 2p spectra of Pt<sub>1</sub>/oxide/C and oxide/C.

Figure S16

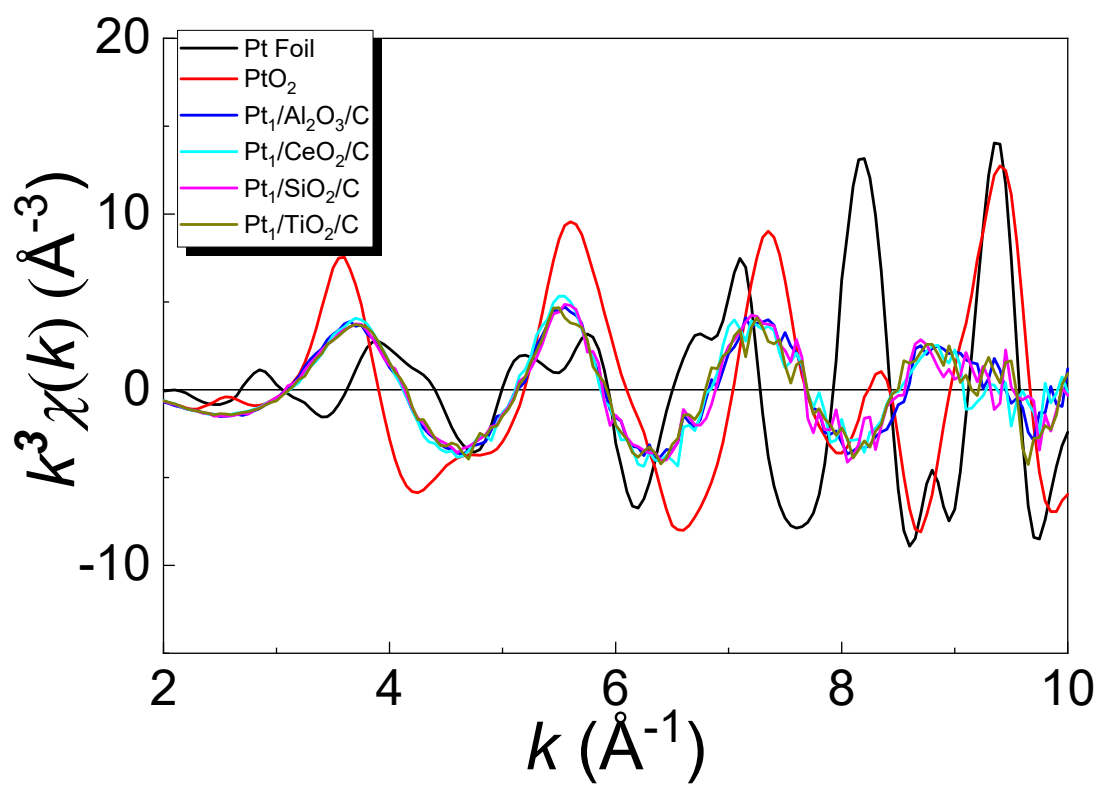

Figure S16  $k^3$ -weighted FT-EXAFS spectra of Pt Foil, PtO<sub>2</sub>, and Pt<sub>1</sub>/oxide/C.

Figure S17

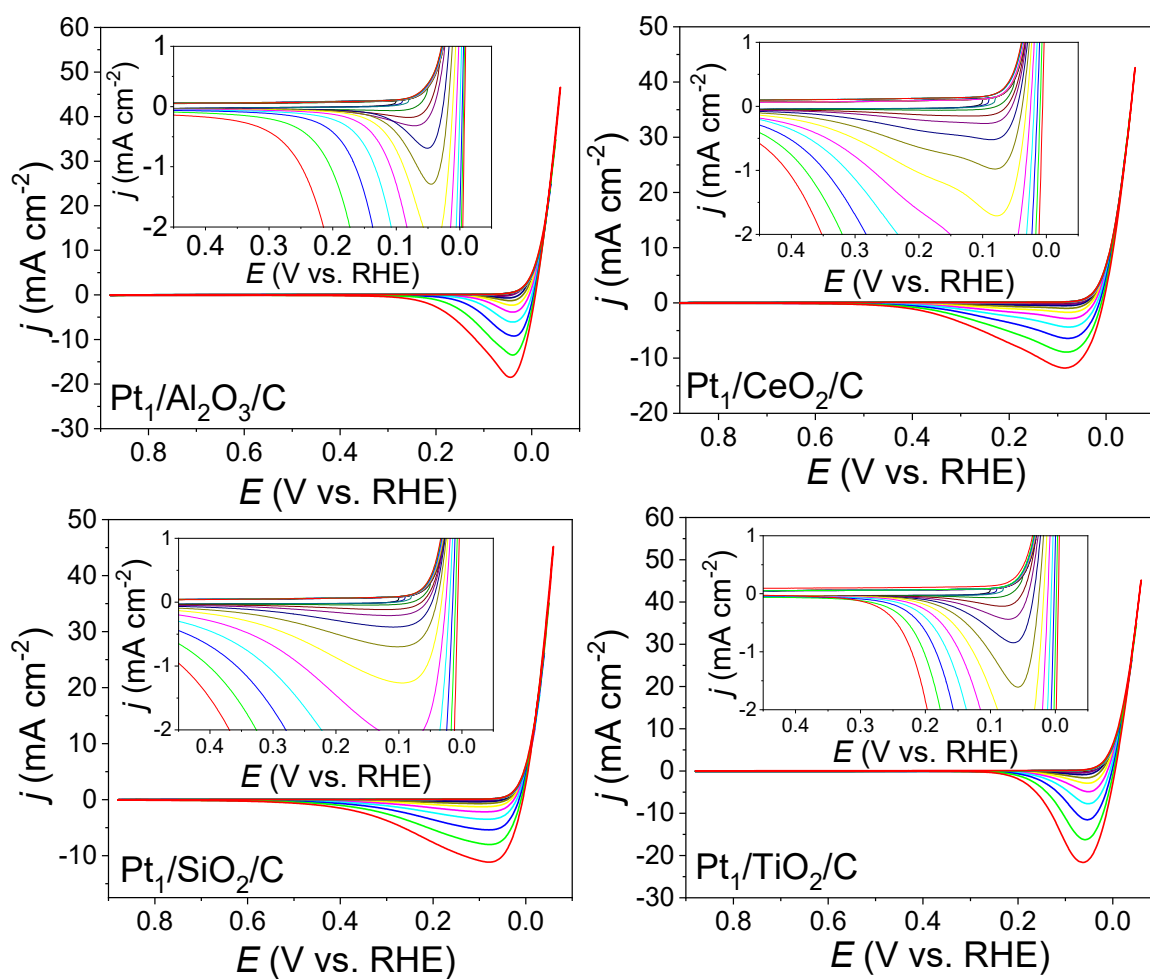

Figure S17 CVs of Pt<sub>1</sub>/oxide/C recorded at various reversed potentials in Ar-saturated 0.5 M H<sub>2</sub>SO<sub>4</sub> at a scan rate of 50 mVs<sup>-1</sup>.

Figure S18

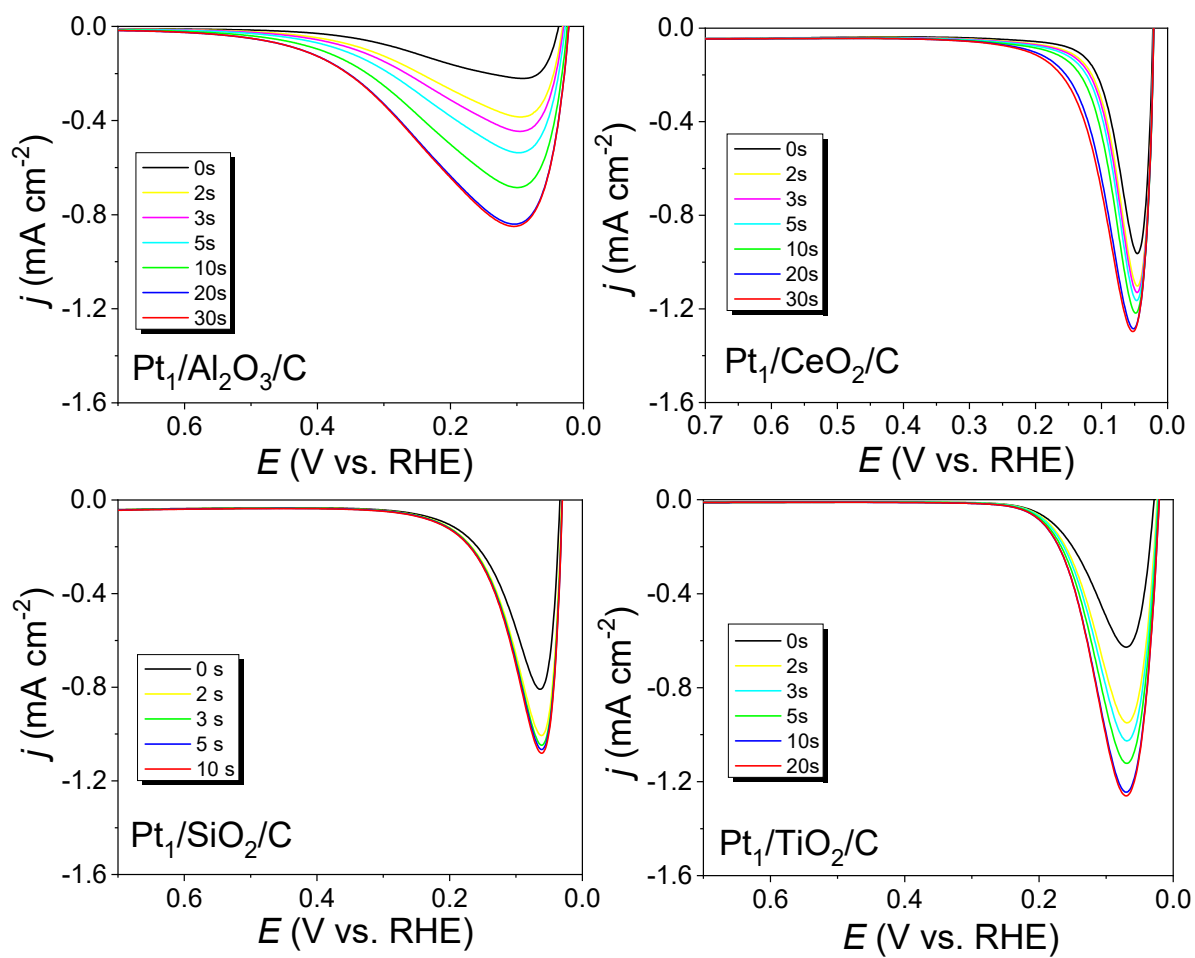

Figure S18 Anodic LSVs for H<sub>upd</sub> recorded on Pt<sub>1</sub>/oxide/C (0.19 μg cm<sup>-2</sup> Pt loading) after holding at 0.04 V for various durations.

Figure S19

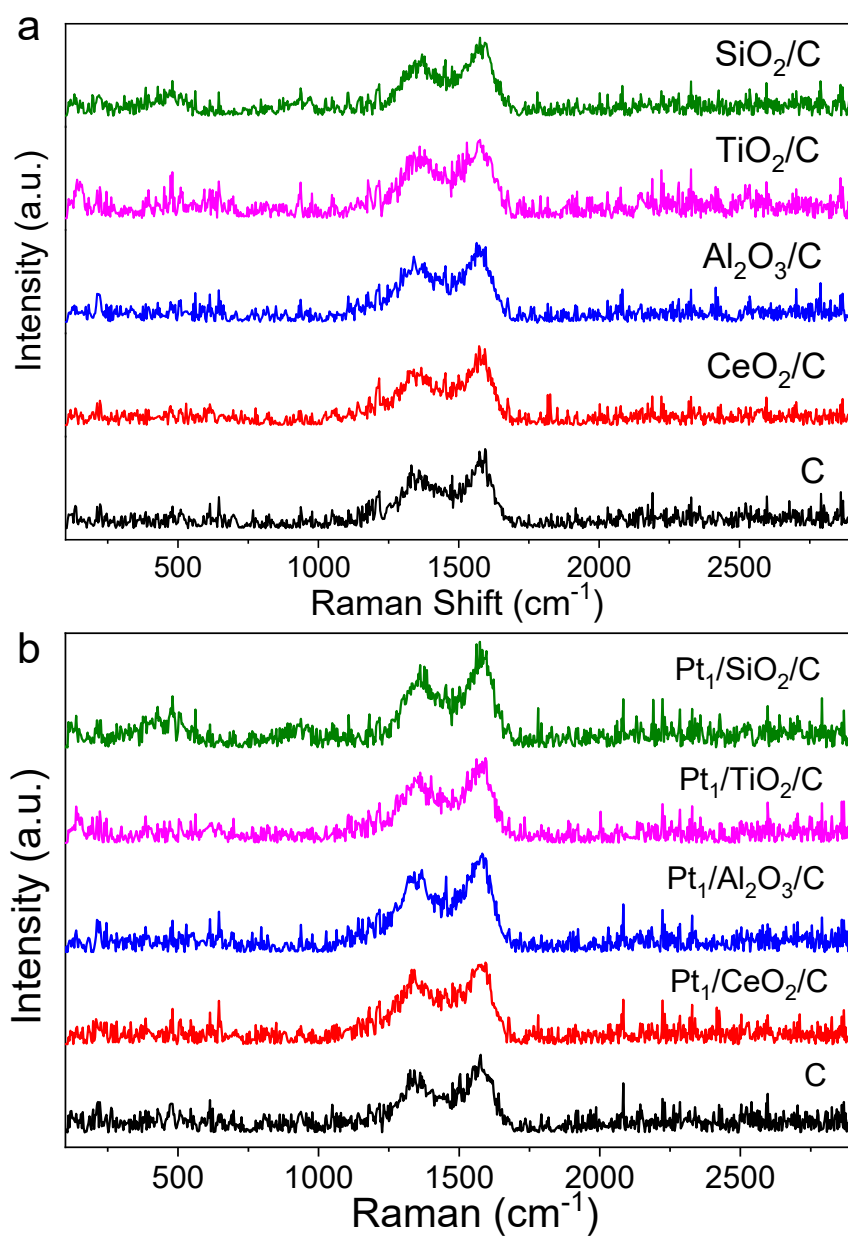

Figure S19 Raman spectra of C, (a) oxide/C, and (b) Pt<sub>1</sub>/oxide/C

### The Stability of Pt<sub>1</sub>/oxide/C in the HER Process

To evaluate its durability, Pt<sub>1</sub>/oxide/C underwent 2000 continuous potential cycles from 0.8 V to -0.1 V vs. RHE at a scan rate of 0.05 V/s. The polarization curves for the first and 2000th cycles remained almost identical, with no significant changes, as shown in Figs S20a-S20d. Although Pt ions may transfer into the electrolyte under high anodic potentials (>0.8 V vs. RHE), they remained stable under cathodic HER conditions. ICP-MS analysis confirmed that the Pt<sup>2+</sup> content in the electrolyte was below 5 ppb, indicating that Pt<sub>1</sub> sites on Pt<sub>1</sub>/oxide/C remained intact, and the catalyst did not deactivate during HER operation.

For practical application, the stability of Pt<sub>1</sub>/oxide/C was further examined at a moderate current density (~35 mA cm<sup>-2</sup>, corresponding to an overpotential of 50 mV. PS: the catalyst ink is unstable at large current density, ~100 mA cm<sup>-2</sup>). Chronoamperometry (CA) measurements (Fig. S20e) showed that Pt<sub>1</sub>/oxide/C retained 95% of its initial current after 1 hour. Although the current density gradually dropped to 85% in the first hour, it remained stable over 10 hours, with no significant increase in Pt<sup>2+</sup> content in the electrolyte. However, CV tracking results revealed a slight cathodic shift in the HER onset potential from 0.05 V to 0.0 V vs. RHE, which is close to the behavior of bulk Pt. Since the Pt content in the catalyst did not significantly decrease, this activity decline is likely due to electrode surface polarization effects, causing Pt single-atom migration and aggregation into larger clusters during HER operation. This issue needs to be further addressed to enhance the long-term stability of Pt<sub>1</sub>/oxide/C under high-current density HER conditions.



Figure S20

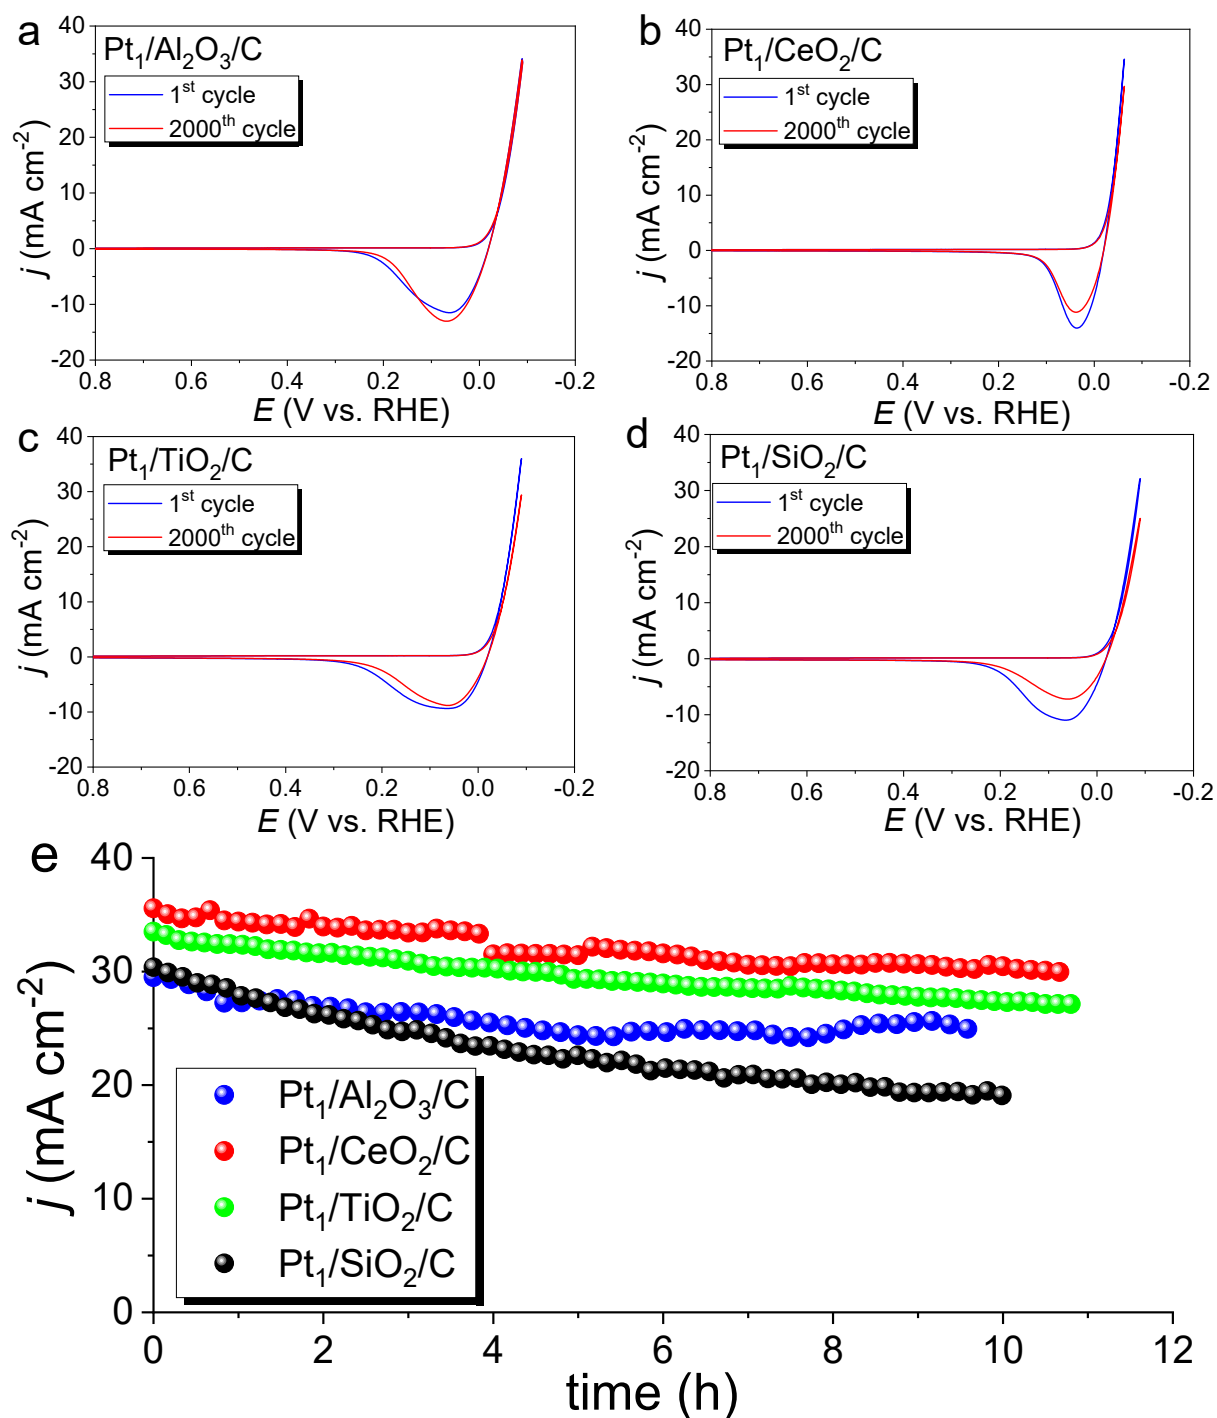

**Figure S20.** (a)(b)(c)(d) CVs of Pt<sub>1</sub>/oxide/C were recorded at (blue line) the first and (red line) the 2000<sup>th</sup> cycles in 0.5 M H<sub>2</sub>SO<sub>4(aq)</sub>. (e) Long-term stability of Pt<sub>1</sub>/oxide/C examined by chronoamperometry at overpotentials of 50 mV (current density ~35 mA cm<sup>-2</sup>) for HER in 0.5 M H<sub>2</sub>SO<sub>4(aq)</sub>.

**Table S1** The characteristics of Pt<sub>1</sub>/oxide/C and Pt/C measured by electrochemical method

| Catalyst                                           | A <sub>BET</sub> *<br>m <sup>2</sup> /g | Q <sub>CO</sub><br>μC | Q <sub>Hupd</sub><br>μC | sECSA <sub>CO</sub> *<br>m <sup>2</sup> /g | sECSA <sub>H</sub> *<br>m <sup>2</sup> /g | d <sub>av</sub><br>nm | N <sub>Pt1</sub> /A <sub>BET</sub><br>k μm <sup>-2</sup> | D <sub>ec</sub><br>nm |
|----------------------------------------------------|-----------------------------------------|-----------------------|-------------------------|--------------------------------------------|-------------------------------------------|-----------------------|----------------------------------------------------------|-----------------------|
| Pt <sub>1</sub> /Al <sub>2</sub> O <sub>3</sub> /C | 61.3                                    | 42.3                  | 22.7                    | 740.6                                      | 794.6                                     | 0.35±0.1              | 683.1±1.5                                                | 0.86±0.03             |
| Pt <sub>1</sub> /CeO <sub>2</sub> /C               | 35.8                                    | 48.7                  | 22.3                    | 852.7                                      | 779.8                                     | 0.36±0.1              | 1105.2±2.2                                               | 0.59±0.02             |
| Pt <sub>1</sub> /SiO <sub>2</sub> /C               | 43.2                                    | 43.2                  | 22.2                    | 756.3                                      | 777.3                                     | 0.36±0.1              | 907.6±2.0                                                | 0.69±0.02             |
| Pt <sub>1</sub> /TiO <sub>2</sub> /C               | 47.3                                    | 42.6                  | 22.2                    | 746.2                                      | 778.2                                     | 0.36±0.1              | 831.0±3.2                                                | 0.74±0.04             |
| Pt/C                                               | 124.9                                   | 2.96                  | 1.21                    | 52.9                                       | 57.5                                      | 4.86±0.3              | 0.094±0.006                                              | 98.6±0.2              |

\* A<sub>BET</sub>: the Brunauer-Emmett-Teller (BET) surface area of oxides or carbon; sECSA<sub>CO</sub> and sECSA<sub>H</sub>: the specific ECSA of Pt (sECSA = ECSA/Pt weight, m<sup>2</sup> g<sup>-1</sup>) was evaluated from ECSA<sub>CO</sub> and ECSA<sub>H</sub>.

**Table S2.** HER performances of Pt-SACs and Pt-catalysts

| Catalysts                                                       | Tafel<br>(mV/dec) | $\eta_{10}$<br>(mV) | TOF<br>(s <sup>-1</sup> ) | $i_{mPt(\eta/mV)}$<br>(A/mg) | electrolyte                         | Refs.           |
|-----------------------------------------------------------------|-------------------|---------------------|---------------------------|------------------------------|-------------------------------------|-----------------|
| Pt <sub>1</sub> /Al <sub>2</sub> O <sub>3</sub> /C              | 32.1              | 16                  | 490.1                     | 484.8                        | 0.5M H <sub>2</sub> SO <sub>4</sub> | This<br>work    |
| Pt <sub>1</sub> /CeO <sub>2</sub> /C                            | 30.6              | 11                  | 586.4                     | 580.2                        | 0.5M H <sub>2</sub> SO <sub>4</sub> |                 |
| Pt <sub>1</sub> /SiO <sub>2</sub> /C                            | 31.1              | 12                  | 503.5                     | 498.2                        | 0.5M H <sub>2</sub> SO <sub>4</sub> |                 |
| Pt <sub>1</sub> /TiO <sub>2</sub> /C                            | 31.2              | 12                  | 576.9                     | 570.6                        | 0.5M H <sub>2</sub> SO <sub>4</sub> |                 |
| Pt/C                                                            | 32.1/121.6        | 71                  | 1.9                       | 1.9                          | 0.5M H <sub>2</sub> SO <sub>4</sub> |                 |
| Pt–Ru dimer                                                     | 26                | 59                  | 4.14                      | 3.49                         | 0.5M H <sub>2</sub> SO <sub>4</sub> | s <sup>1</sup>  |
| CoPt–Pt <sub>SA</sub> /NDPCF                                    | 24.84             | 20                  | 75.11 <sub>50</sub>       | 74.31 <sub>50</sub>          | 0.5M H <sub>2</sub> SO <sub>4</sub> | s <sup>2</sup>  |
| Pt/N-VG-5                                                       | 52.2              | 42                  | N/A                       | 4.45 <sub>50</sub>           | 0.5M H <sub>2</sub> SO <sub>4</sub> | s <sup>3</sup>  |
| P–Pt <sub>3</sub> Co/NC                                         | 13                | 136                 | 1.33                      | 59.8                         | 0.5M H <sub>2</sub> SO <sub>4</sub> | s <sup>4</sup>  |
| Pt <sub>1</sub> SAC-VNGNMA <sub>s</sub>                         | 49                | 15                  | ~1.5 <sub>50</sub>        | ~1.5 <sub>50</sub>           | 0.5M H <sub>2</sub> SO <sub>4</sub> | s <sup>5</sup>  |
| Pt/TiON <sub>x</sub>                                            | 29.5              | N/A                 | 12.15 <sub>50</sub>       | 1.41 <sub>50</sub>           | 0.1 M HClO <sub>4</sub>             | s <sup>6</sup>  |
| A-Pt                                                            | 97.0              | 89.7                | 0.487 <sub>10</sub>       | 0.948 <sub>10</sub>          | 0.5M H <sub>2</sub> SO <sub>4</sub> | s <sup>7</sup>  |
| Ti <sub>3</sub> C <sub>2</sub> T <sub>x</sub> -PtSA             | 45                | 38                  | 23.45                     | 23.21                        | 0.5M H <sub>2</sub> SO <sub>4</sub> | s <sup>8</sup>  |
| PtW <sub>6</sub> O <sub>24</sub> /C                             | 29.8              | 22                  | 33.35 <sub>100</sub>      | 20.175 <sub>77</sub>         | 0.5M H <sub>2</sub> SO <sub>4</sub> | s <sup>9</sup>  |
| Pt <sub>1</sub> <sup>01</sup> /Ti <sub>1-x</sub> O <sub>2</sub> | 31                | 22                  | N/A                       | 23.92 <sub>50</sub>          | 0.5M H <sub>2</sub> SO <sub>4</sub> | s <sup>10</sup> |
| PtCo@PtSn                                                       | 24                | 21                  | 3.3                       | 3.31                         | 0.5M H <sub>2</sub> SO <sub>4</sub> | s <sup>11</sup> |
| Pt-PVP/TNR@GC                                                   | 27                | 21                  | N/A                       | 16.53 <sub>50</sub>          | 0.5M H <sub>2</sub> SO <sub>4</sub> | s <sup>12</sup> |
| AC Pt-NG/C                                                      | 27                | 35.28               | 0.0927 <sub>50</sub>      | 6.508 <sub>50</sub>          | 0.5M H <sub>2</sub> SO <sub>4</sub> | s <sup>13</sup> |
| Pt/RuCeO <sub>x</sub> -PA                                       | 31                | 41                  | N/A                       | 0.375 <sub>50</sub>          | 0.5M H <sub>2</sub> SO <sub>4</sub> | s <sup>14</sup> |
| 3Pt/CuG                                                         | 27.6              | 20                  | N/A                       | 40.1 <sub>50</sub>           | 0.5M H <sub>2</sub> SO <sub>4</sub> | s <sup>15</sup> |
| LPWGA                                                           | 30                | 42                  | 29.05 <sub>50</sub>       | 28.70 <sub>50</sub>          | 0.5M H <sub>2</sub> SO <sub>4</sub> | s <sup>16</sup> |
| 2-Pt/NC-CC                                                      | 36.65             | 123                 | 0.9354 <sub>50</sub>      | 0.907 <sub>50</sub>          | 0.5M H <sub>2</sub> SO <sub>4</sub> | s <sup>17</sup> |
| <u>Pt@DG</u>                                                    | 48                | 30                  | 26.41 <sub>100</sub>      | 28.38 <sub>100</sub>         | 0.5M H <sub>2</sub> SO <sub>4</sub> | s <sup>18</sup> |
| Pt/NiO@Ni/NF                                                    | 40                | 34                  | N/A                       | 0.532 <sub>50</sub>          | 1M KOH                              | s <sup>19</sup> |
| Pt-SAs/C                                                        | 43                | 38                  | N/A                       | 3.01 <sub>50</sub>           | 0.5M H <sub>2</sub> SO <sub>4</sub> | s <sup>20</sup> |
| Pt <sub>0.2</sub> -CeO <sub>2</sub>                             | 35                | N/A                 | N/A                       | 7.6 <sub>50</sub>            | 0.5M H <sub>2</sub> SO <sub>4</sub> | s <sup>21</sup> |
| Pt-SAs/MoS <sub>2</sub>                                         | 28                | 32                  | 12.83 <sub>50</sub>       | 47.48 <sub>100</sub>         | 0.5M H <sub>2</sub> SO <sub>4</sub> | s <sup>22</sup> |
| PtO <sub>x</sub> /TiO <sub>2</sub>                              | 40                | N/A                 | N/A                       | 8.68 <sub>50</sub>           | 0.5M H <sub>2</sub> SO <sub>4</sub> | s <sup>23</sup> |
| Pt <sub>2</sub> Ir DNWs/C                                       | 20.9              | 26                  | 17.08 <sub>50</sub>       | 5.17 <sub>50</sub>           | 0.5M H <sub>2</sub> SO <sub>4</sub> | s <sup>24</sup> |
| Pt/MXene                                                        | 297               | 34                  | 10.66                     | 1.847 <sub>50</sub>          | 0.5M H <sub>2</sub> SO <sub>4</sub> | s <sup>25</sup> |
| Pt-SAs/EVG                                                      | 35                | 21.3                | 34.60 <sub>70</sub>       | 32.90 <sub>70</sub>          | 0.5M H <sub>2</sub> SO <sub>4</sub> | s <sup>26</sup> |

|                                            |       |       |                      |                       |                                     |                 |
|--------------------------------------------|-------|-------|----------------------|-----------------------|-------------------------------------|-----------------|
| NGA-COF@Pt                                 | 21.88 | 13    | 18.40 <sub>44</sub>  | 18.165 <sub>44</sub>  | 0.5M H <sub>2</sub> SO <sub>4</sub> | s <sup>27</sup> |
| Pt <sub>1</sub> +Pt <sub>n</sub> /MXene-7  | 32.5  | 61.3  | 0.488 <sub>100</sub> | 0.4849 <sub>100</sub> | 0.5M H <sub>2</sub> SO <sub>4</sub> | s <sup>28</sup> |
| PtSA-M-CeO <sub>2</sub> -X/rGO             | 22.8  | 25    | 15.46 <sub>50</sub>  | 15.3 <sub>50</sub>    | 0.5M H <sub>2</sub> SO <sub>4</sub> | s <sup>29</sup> |
| Pt-SA/pCNFs                                | 24    | 21    | 14.8 <sub>50</sub>   | ~14 <sub>50</sub>     | 0.5M H <sub>2</sub> SO <sub>4</sub> | s <sup>30</sup> |
| Pt@Mn-SAs/N-C                              | 30.7  | 25    | N/A                  | 1.5 <sub>50</sub>     | 0.5M H <sub>2</sub> SO <sub>4</sub> | s <sup>31</sup> |
| Pt <sub>1</sub> Ru <sub>x</sub> @C         | 20.7  | 13.15 | N/A                  | 9.075 <sub>100</sub>  | 0.5M H <sub>2</sub> SO <sub>4</sub> | s <sup>32</sup> |
| Pt/V · -Mn <sub>3</sub> O <sub>4</sub> NSs | 30.2  | 19.2  | 44.54 <sub>100</sub> | 12.56 <sub>50</sub>   | 0.5M H <sub>2</sub> SO <sub>4</sub> | s <sup>33</sup> |

**Table S3.** The best-fitting FT-EXAFS parameters of Pt<sub>1</sub>/oxide/C catalysts\*

|                                                    | Scattering Path | N   | $\sigma^2$ (Å <sup>2</sup> ) | R(Å) | R <sub>f</sub> |
|----------------------------------------------------|-----------------|-----|------------------------------|------|----------------|
| Pt foil                                            | Pt-Pt           | 12  | 0.005                        | 2.76 | 0.002          |
| PtO <sub>2</sub>                                   | Pt-O            | 6   | 0.003                        | 2.02 | 0.006          |
| Pt <sub>1</sub> /Al <sub>2</sub> O <sub>3</sub> /C | Pt-O            | 3.6 | 0.003                        | 2.09 | 0.005          |
| Pt <sub>1</sub> /CeO <sub>2</sub> /C               | Pt-O            | 3.8 | 0.002                        | 2.1  | 0.004          |
| Pt <sub>1</sub> /SiO <sub>2</sub> /C               | Pt-O            | 3.6 | 0.003                        | 2.11 | 0.016          |
| Pt <sub>1</sub> /TiO <sub>2</sub> /C               | Pt-O            | 3.7 | 0.004                        | 2.11 | 0.01           |

\*Where N is coordination number, R is distance between absorber and backscatter atoms,  $\sigma^2$  is Debye–Waller factor value, R<sub>f</sub> is R-factor characterizing the goodness of fit. S<sub>0</sub><sup>2</sup> was fixed to 0.8 as determined from PtO<sub>2</sub> fitting. Error bounds (accuracies) characterizing the structural parameters obtained by EXAFS data analysis are estimated to be as follows: N, ±20%; R, ±1%; and  $\sigma^2$ , ±20%.

### Author Contributions

Conceptualization: JFH

Methodology and experiment: JFH, LJC, BZY, JLC

Investigation: JFH, LJC, BZY, JLC

Funding acquisition: JFH

Project administration: JFH

Supervision: JFH

Writing: JFH

### References

- S1. W. K. Zhao, C. Luo, Y. Lin, G. B. Wang, H. M. Chen, P. Y. Kuang and J. G. Yu, *ACS Catal.*, 2022, **12**, 5540-5548.
- S2. W. W. Yang, P. Cheng, Z. Li, Y. X. Lin, M. Y. Li, J. Z. Zi, H. H. Shi, G. S. Li, Z. C. Lian and H. X. Li, *Adv. Funct. Mater.*, 2022, **32**, 2205920.
- S3. H. Z. Yang, Z. J. Yang, Z. J. Han, D. W. Chu, C. Q. Chen, X. Y. Xie, L. Shang and T. R. Zhang, *2D Mater.*, 2022, **9**, 045011.
- S4. C. F. Li, C. Tian, H. B. Tang, M. R. Liu, L. R. Zheng, F. Z. Huang, G. R. Li and Q. Li, *ACS Energy Lett.*, 2023, **8**, 5161-5169.
- S5. K. Chi, Z. X. Chen, F. Xiao, W. Guo, W. Xi, J. Liu, H. Yan, Z. Y. Zhang, J. Xiao, J. Liu, J. Luo, S. Wang and K. P. Loh, *J. Mater. Chem. A*, 2019, **7**, 15575-15579.

- S6. M. Smiljanic, S. Panic, M. Bele, F. Ruiz-Zepeda, L. Pavko, L. Gasparic, A. Kokalj, M. Gaberscek and N. Hodnik, *ACS Catal.*, 2022, **12**, 13021-13033.
- S7. Z. H. Ma, C. Chen, X. Z. Cui, L. M. Zeng, L. J. Wang, W. Jiang and J. L. Shi, *ACS Appl. Mater. Interfaces*, 2021, **13**, 44224-44233.
- S8. J. J. Zhang, E. Q. Wang, S. Q. Cui, S. B. Yang, X. L. Zou and Y. J. Gong, *Nano Lett.*, 2022, **22**, 1398-1405.
- S9. F. Y. Yu, Z. L. Lang, L. Y. Yin, K. Feng, Y. J. Xia, H. Q. Tan, H. T. Zhu, J. Zhong, Z. H. Kang and Y. G. Li, *Nat. Commun.*, 2020, **11**, 490.
- S10. F. Lu, D. Yi, S. J. Liu, F. Zhan, B. Zhou, L. Gu, D. Golberg, X. Wang and J. N. Yao, *Angew. Chem. Int. Ed.*, 2020, **59**, 17712-17718.
- S11. J. L. Chen, G. F. Qian, H. Zhang, S. Q. Feng, Y. S. Mo, L. Luo and S. B. Yin, *Adv. Funct. Mater.*, 2022, **32**, 2107597.
- S12. C. Li, Z. Chen, H. Yi, Y. Cao, L. Du, Y. D. Hu, F. P. Kong, R. K. Campen, Y. Z. Gao, C. Y. Du, G. P. Yin, I. Y. Zhang and Y. J. Tong, *Angew. Chem. Int. Ed.*, 2020, **59**, 15902-15907.
- S13. M. H. Sun, J. P. Ji, M. Y. Hu, M. Y. Weng, Y. P. Zhang, H. S. Yu, J. J. Tang, J. C. Zheng, Z. Jiang, F. Pan, C. D. Liang and Z. Lin, *ACS Catal.*, 2019, **9**, 8213-8223.
- S14. T. T. Liu, W. B. Gao, Q. Q. Wang, M. L. Dou, Z. P. Zhang and F. Wang, *Angew. Chem. Int. Ed.*, 2020, **59**, 20423-20427.
- S15. Y. D. Xu, D. M. Meng, L. W. Wang, H. Yang, X. F. Guo, Y. Zhu, T. Wang and W. P. Ding, *Appl. Surf. Sci.*, 2022, **591**, 153057.
- S16. Y. Li, K. Y. Jiang, J. Yang, Y. Y. Zheng, R. Hübner, Z. W. Ou, X. Dong, L. Q. He, H. L. Wang, J. Li, Y. J. Sun, X. B. Lu, X. D. Zhuang, Z. K. Zheng and W. Liu, *Small*, 2021, **17**, 2102159.
- S17. R. Ramesh, S. Han, D. K. Nandi, S. Y. Sawant, D. H. Kim, T. Cheon, M. H. Cho, R. Harada, T. Shigetomi, K. Suzuki and S. H. Kim, *Adv. Mater. Interfaces*, 2021, **8**, 2001508.
- S18. Q. Yang, H. X. Liu, P. Yuan, Y. Jia, L. Z. Zhuang, H. W. Zhang, X. C. Yan, G. H. Liu, Y. F. Zhao, J. Z. Liu, S. Q. Wei, L. Song, Q. L. Wu, B. Q. Ge, L. Z. Zhang, K. Wang, X. Wang, C. R. Chang and X. D. Yao, *J. Am. Chem. Soc.*, 2022, **144**, 2171-2178.
- S19. Z. J. Chen, G. X. Cao, L. Y. Gan, H. Dai, N. Xu, M. J. Zang, H. B. Dai, H. Wu and P. Wang, *ACS Catal.*, 2018, **8**, 8866-8872.
- S20. Z. Y. Wang, J. Yang, J. Gan, W. X. Chen, F. Y. Zhou, X. Zhou, Z. Q. Yu, J. F. Zhu, X. Z. Duan and Y. E. Wu, *J. Mater. Chem. A*, 2020, **8**, 10755-10760.
- S21. J. J. Gao, P. Du, Q. H. Zhang, X. Shen, F. K. Chiang, Y. R. Wen, X. Lin, X. J. Liu and H. J. Qiu, *Electrochim. Acta*, 2019, **297**, 155-162.
- S22. Y. Shi, Z. R. Ma, Y. Y. Xiao, Y. C. Yin, W. M. Huang, Z. C. Huang, Y. Z. Zheng, F. Y. Mu, R. Huang, G. Y. Shi, Y. Y. Sun, X. H. Xia and W. Chen, *Nat. Commun.*, 2021, **12**, 3021.

- S23. X. Cheng, Y. H. Li, L. R. Zheng, Y. Yan, Y. F. Zhang, G. Chen, S. R. Sun and J. J. Zhang, *Energy Environ. Sci.*, 2017, **10**, 2450-2458.
- S24. M. M. Wang, M. J. Wang, C. H. Zhan, H. B. Geng, Y. H. Li, X. Q. Huang and L. Z. Bu, *J. Mater. Chem. A*, 2022, **10**, 18972-18977.
- S25. Y. C. Wu, W. Wei, R. H. Yu, L. X. Xia, X. F. Hong, J. X. Zhu, J. T. Li, L. Lv, W. Chen, Y. Zhao, L. Zhou and L. Q. Mai, *Adv. Funct. Mater.*, 2022, **32**, 2110910.
- S26. B. W. Ren, J. D. Huang, P. Li, W. Xu and B. Dong, *J. Colloid Interface Sci.*, 2025, **678**, 511-519.
- S27. Z. Q. Zhang, Z. Zhang, C. L. Chen, R. Wang, M. G. Xie, S. Wan, R. G. Zhang, L. C. Cong, H. Y. Lu, Y. Han, W. Xing, Z. Shi and S. H. Feng, *Nat. Commun.*, 2024, **15**, s41467-41024-46872-x.
- S28. X. Sun, J. Wang, J. Yu, Y. F. Jing, J. Y. Liu, M. Singh, P. D. Lund and M. I. Asghar, *Int. J. Hydrog. Energy*, 2024, **84**, 502-510.
- S29. X. Y. Liu, Y. X. Zhou, J. K. Lin, X. Xiao, Z. J. Wang, L. Y. Jia, M. Y. Li, K. Yang, J. C. Fan, W. W. Yang and G. S. Li, *Angew. Chem.-Int. Edit.*, 2024, **63**, anie202406650.
- S30. Y. Han, H. L. Duan, W. Liu, C. H. Zhou, B. S. Wang, Q. Y. Jiang, S. H. Feng, W. S. Yan, T. Tan and R. F. Zhang, *Appl. Catal. B-Environ. Energy*, 2023, **335**, 9.
- S31. L. Gong, J. W. Zhu, F. J. Xia, Y. H. Zhang, W. J. Shi, L. Chen, J. Yu, J. S. Wu and S. C. Mu, *ACS Catal.*, 2023, **13**, 4012-4020.
- S32. X. Y. Zhu, M. H. Fang, B. Z. Yang, M. L. Zhan, S. R. Ke, F. Yang, X. W. Wu, Y. G. Liu, Z. H. Huang and X. Min, *J. Mater. Chem. A*, 2024, **12**, 4108-4122.
- S33. D. X. Hu, Y. J. Wang, W. H. Chen, Z. Q. Jiang, B. L. Deng and Z. J. Jiang, *Small*, 2024, DOI: 10.1002/sml.202402652.
